# Supplementary material for: The use of explainable artificial intelligence to explore types of fenestral otosclerosis misdiagnosed when using temporal bone high-resolution computed tomography
Source: PubMed Central journal article supplement — Ann Transl Med. 2021 Jun;9(12):969. doi: 10.21037/atm-21-1171 (PMC8267294; doi:10.21037/atm-21-1171), 2021-06
Supplement: atm-09-12-969-dss.pdf [file atm-09-12-969-dss.pdf]

## Data Sharing Statement

|                     |                                                                                                                                                    |                                                                                                                                                                                                                                                                                                                                                                                                                                                                     |
|---------------------|----------------------------------------------------------------------------------------------------------------------------------------------------|---------------------------------------------------------------------------------------------------------------------------------------------------------------------------------------------------------------------------------------------------------------------------------------------------------------------------------------------------------------------------------------------------------------------------------------------------------------------|
| <b>Article Info</b> | <a href="http://dx.doi.org/10.21037/atm-21-1171">http://dx.doi.org/10.21037/atm-21-1171</a>                                                        |                                                                                                                                                                                                                                                                                                                                                                                                                                                                     |
| <b>Item</b>         | <b>Question</b>                                                                                                                                    | <b>Authors' Response</b><br>(place "-" if not applicable)                                                                                                                                                                                                                                                                                                                                                                                                           |
| 1                   | Would you like to share data collected for your study to others?                                                                                   | Yes.                                                                                                                                                                                                                                                                                                                                                                                                                                                                |
| 2                   | If not, would you like to share the reason for your decision?                                                                                      | -                                                                                                                                                                                                                                                                                                                                                                                                                                                                   |
| 3                   | What data in particular will be shared?                                                                                                            | The clinical test data in particular will be shared. We are releasing our prospectively collected test set that has been preprocessed using our first stage algorithm. This dataset includes CT scans from 144 patients and demonstrates class imbalance across otosclerosis and normal labels. These labels are based on the intraoperative findings in the diagnosis of the surgical ear. In addition, we uploaded the test set of subdivided otosclerosis types. |
| 4                   | Any other documents will be share? Such as study protocol, statistical analysis plan, informed consent form, clinical study report, analytic code. | The laboratory data in particular will be shared                                                                                                                                                                                                                                                                                                                                                                                                                    |
| 5                   | When will data availability begin?                                                                                                                 | From the publication date.                                                                                                                                                                                                                                                                                                                                                                                                                                          |
| 6                   | When will data availability end?                                                                                                                   | 10 years within the publication date, since the technique or survival date may be updated over time.                                                                                                                                                                                                                                                                                                                                                                |
| 7                   | To whom will you share the data?                                                                                                                   | Medical workers.                                                                                                                                                                                                                                                                                                                                                                                                                                                    |
| 8                   | For what type of analysis or purpose?                                                                                                              | For analysis to evaluate the dignosis of fenestral otosclerosis.                                                                                                                                                                                                                                                                                                                                                                                                    |
| 9                   | How or where can the data/documents be obtained?                                                                                                   | Emails could be sent to the address below to obtain the shared data: <a href="mailto:byan@fudan.edu.cn">byan@fudan.edu.cn</a><br>The dataset is available at <a href="https://pan.baidu.com/s/1KXfeKcV_FGQdzxr_NYPMYQ">https://pan.baidu.com/s/1KXfeKcV_FGQdzxr_NYPMYQ</a> (Extraction code: b8w9). Our deep learning-based otosclerosis-LNN model is available at                                                                                                  |

|    |                         |                                                                             |
|----|-------------------------|-----------------------------------------------------------------------------|
|    |                         | <a href="https://github.com/C-H-D/OLNN">https://github.com/C-H-D/OLNN</a> . |
| 10 | Any other restrictions? | No.                                                                         |
